# Supplementary material for: Association of Self-Reported Medication Adherence with Potentially Inappropriate Medications in Elderly Patients: A Cross-Sectional Pilot Study
Source: MDPI journal article supplement (doi:10.3390/ijerph17165940), 2020-08-16
Supplement: s1 [file s1]

**Table S1.** List of drug category, class, target patient population, and recommendation for PIMs screening in this study.

| Category                          | Class                              | Target patient population       | Recommendation                                                                                                                                      |
|-----------------------------------|------------------------------------|---------------------------------|-----------------------------------------------------------------------------------------------------------------------------------------------------|
| Hypnotics                         | Benzodiazepines                    | All                             | Avoid                                                                                                                                               |
|                                   | Nonbenzodiazepines                 | All                             | Avoid                                                                                                                                               |
| Sulpiride                         | Sulpiride                          | All                             | If used, 50 mg/day or less                                                                                                                          |
| Antithrombotic drugs <sup>a</sup> | Antithrombotic drugs (combination) | All                             | Do not use for a long period (12 months or more) and use it alone.                                                                                  |
| Diuretics <sup>b</sup>            | Loop diuretic                      | All                             | If the decrease in circulating plasma volume is suspected, the use should be minimized, and discontinuation or dose reduction should be considered. |
| Alpha blocking agents             | Alpha 1 blocking agents            | All                             | Avoid                                                                                                                                               |
| H2 receptor antagonists           | H2 receptor antagonists            | All                             | Avoid                                                                                                                                               |
| Laxative                          | Magnesium oxide                    | Patients with renal dysfunction | Avoid                                                                                                                                               |
| Antidiabetes drugs                | Sulfonylurea                       | All                             | Avoid                                                                                                                                               |
|                                   | Biguanide                          | All                             | Avoid                                                                                                                                               |
|                                   | Thiazolidine                       | Patients with heart failure     | Avoid                                                                                                                                               |
|                                   | SGLT2 inhibitor                    | All                             | Avoid                                                                                                                                               |
| Overactive bladder drugs          | Muscarinic receptor antagonist     | All                             | Avoid                                                                                                                                               |
| NSAIDs                            | NSAIDs                             | All                             | Consideration of combined use of PPIs to prevent gastrointestinal adverse events in patients with difficult discontinuation.                        |

PIM, potentially inappropriate medication; SGLT, Sodium-glucose co-transporter; NSAIDs, nonsteroidal anti-inflammatory drugs.

<sup>a</sup> We could not obtain accurate data on the long-term combined use of multiple antithrombotic agents in this study. Thus, the recommended administration period of the combined use of multiple antithrombotic agents was excluded from screening.

<sup>b</sup> This item was judged by a pharmacist and a doctor other than the attending physician.
